# Supplementary material
Source: Springer Nature journal article supplement (https://www.springermedizin.de/resource/supplementary/12968_2008_44_MOESM5_ESM.pdf/9577854)

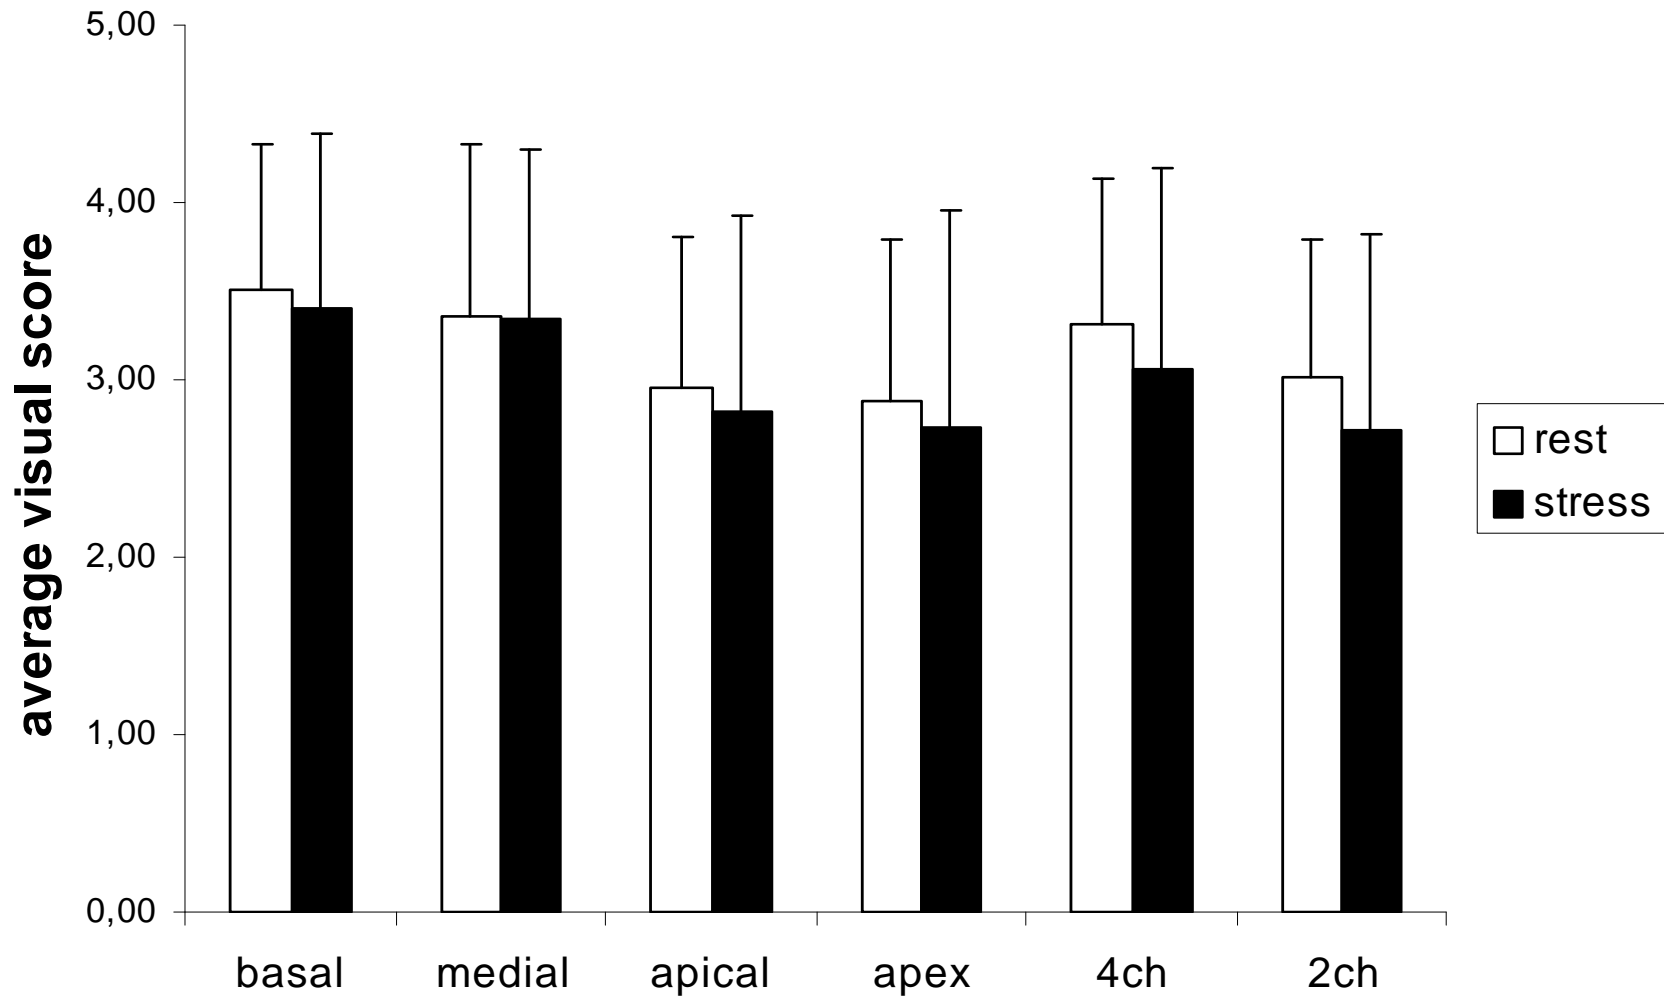

Supplement: MOESM5 [file 9577854]
